# 1 Limited evidence for selection at the *FADS* 2 locus in Native American populations

3  
4 Iain Mathieson<sup>1</sup>

5  
6 <sup>1</sup> Department of Genetics, Perelman School of Medicine, University of Pennsylvania.  
7

## 8 Abstract

9  
10 The *FADS* locus contains the genes *FADS1* and *FADS2* that encode enzymes involved in the  
11 synthesis of long-chain polyunsaturated fatty acids (LC-PUFA). This locus appears to have been  
12 a repeated target of selection in human evolution, likely because dietary input of LC-PUFA  
13 varied over time depending on environment and subsistence strategy. Several recent studies  
14 have identified selection at the *FADS* locus in Native American populations, interpreted as  
15 evidence for adaptation during or subsequent to the passage through Beringia. Here, we show  
16 that these signals of selection are confounded by the presence of parallel adaptation–  
17 postdating their split from Native Americans–in the European and East Asian populations used  
18 in the population branch statistic (PBS) test. This is supported by direct evidence from ancient  
19 DNA that one of the putatively selected haplotypes was already common in Northern Eurasia at  
20 the time of the separation of Native American ancestors. A more parsimonious explanation for  
21 the present-day distribution of the haplotype is that Native Americans retain the ancestral state  
22 of Paleolithic Eurasians. Another haplotype at the locus may reflect a secondary selection  
23 signal, although its functional impact is unknown.  
24

## 25 Introduction

26 Long-chain polyunsaturated fatty acids (LC-PUFA) are essential for many aspects of cellular and  
27 organismal function (Marszalek and Lodish 2005; Darios and Davletov 2006). While they can be  
28 obtained from dietary sources, they can also be synthesized from short-chain PUFA (SC-PUFA)  
29 through the  $\omega$ -3 and  $\omega$ -6 biosynthesis pathways. Some of the steps in these pathways are  
30 catalyzed by the fatty acid desaturase genes *FADS1* and *FADS2* (Nakamura and Nara 2004)  
31 which are located close to each other on human chromosome 11. This locus (which we refer to  
32 as the *FADS* locus) has been targeted by selection multiple times in human evolution (Ameur, et  
33 al. 2012; Mathias, et al. 2012; Mathieson, et al. 2015; Buckley, et al. 2017; Ye, et al. 2017;  
34 Mathieson and Mathieson 2018). There are two LD blocks at the locus, but most studies have  
35 focused on the two major haplotypes at LD block 1 (Ameur, et al. 2012), which we refer to as  
36 the *ancestral* (A) and *derived* (D) haplotypes. LD block 1 is also where the strongest genome-  
37 wide association study signals for lipid levels are detected in European ancestry populations  
38 (Teslovich, et al. 2010). Haplotype D appears to have been under selection—likely preceding the  
39 out-of-Africa bottleneck—in Africa, and is virtually fixed in present-day African populations  
40 (Ameur, et al. 2012; Mathias, et al. 2012). Given this, it is surprising that early Eurasian  
41 populations appear to have largely carried the ancestral haplotype, suggesting selection for the  
42 ancestral haplotype at some time after the split of present-day African and non-African lineages  
43 (Ye, et al. 2017; Mathieson and Mathieson 2018). By the Mesolithic—around 10,000 years  
44 before present (BP)—the ancestral haplotype was fixed in Europe (Mathieson, et al. 2015). The  
45 derived haplotype was reintroduced to Europe in the Neolithic (beginning around 8400 BP) by  
46 the migration of Early Farming populations from Anatolia (Mathieson, et al. 2015), experienced  
47 strong positive selection during the Bronze Age (Buckley, et al. 2017; Mathieson and Mathieson  
48 2018), and is now at a frequency of around 60%. The trajectory of the derived haplotype in East  
49 Asian populations is less clear, but the observations that the 40,000 year old Tianyuan  
50 individual is homozygous for the ancestral haplotype and that the locus has a strong signal of  
51 selection in East Asian populations (1000 Genomes Project Consortium 2015), suggest that a  
52 very similar process might have occurred.

## 53 The ancestral haplotype was common in Upper Paleolithic Eurasia

54 We examined ancient DNA from 16 individuals from Early Upper Paleolithic Eurasia (Fu, et al.  
55 2014; Raghavan, et al. 2014; Fu, et al. 2016; Sikora, et al. 2017; Yang, et al. 2017; Sikora, et al.  
56 2019). Of these individuals' 32 haplotypes, 4 are derived and 28 are ancestral (3 vs 23  
57 supported by more than 6 reads; Figure 1e). This confirms that the derived LD block 1  
58 haplotype was uncommon, though not completely absent, throughout Upper Paleolithic  
59 Eurasia. With a sufficiently intense bottleneck, genetic drift could fix the ancestral haplotype in  
60 the ancestors of Native Americans even if it was not under selection (Harris, et al. 2019).

## 61 Selection scans at the locus are confounded by parallel adaptation

62 Excluding the effects of recent admixture, present-day Native American, Inuit, and Siberian  
63 populations are fixed for the ancestral haplotype (Ameur, et al. 2012; Fumagalli, et al. 2015;  
64 Harris, et al. 2019). Fumagalli, et al. (2015) found a strong signal of selection at the locus in the  
65 Greenlandic Inuit population, which they interpret as an adaptation to a PUFA-rich Arctic diet at  
66 least 20,000 years ago in the common ancestors of present-day Inuit and Siberian populations.  
67 Subsequent studies detected a very similar signal in Native American populations (Amorim, et  
68 al. 2017; Hlusko, et al. 2018; Harris, et al. 2019). Some studies interpret this as evidence for  
69 selection for the ancestral haplotype relatively early on the Native American lineage, although it  
70 could also represent a shared signal from the population ancestral to both Native Americans  
71 and Inuit. Both these signals extend across LD blocks 1 (tagging the ancestral haplotype) and 2.  
72  
73 These studies used the population branch statistic (PBS) (Yi, et al. 2010) to compare Native  
74 American (NA), European (EUR) and East Asian (EAS) populations. The PBS compares genetic  
75 differentiation between three populations and identifies which, if any, of the three branches  
76 has excess differentiation that indicates selection. We write  $PBS(A, (B, C))$  to denote the  
77 statistic that is testing for excess differentiation on the A branch, relative to B and C. However,  
78 the PBS makes the implicit assumption that each of the three branches is independent. If there  
79 is parallel selection on the same haplotype in two population, say B and C, then B and C will  
80 have low  $F_{ST}$ , but each will have high  $F_{ST}$  relative to A. Thus, the PBS will misattribute selection

81 to branch A (Fig. 1a-c). Given low frequency of the derived allele in Upper Paleolithic Eurasia  
82 (Fig. 1d) and parallel selection in EUR and EAS populations (Fig. 1e), we expect that PBS(NA,  
83 (EUR, EAS)) would give a spurious signal of selection in the Native American population.

84

85 We tested this by computing the PBS using Native American, European, and Mesolithic  
86 European populations. We used the PEL (Peruvians from Lima) 1000 Genomes population to  
87 represent Native Americans (1000 Genomes Project Consortium 2015). For each PEL individual,  
88 we restricted to regions of homozygous Native American ancestry (Martin, et al. 2017). We  
89 used CEU (Northern and Western European ancestry) to represent present-day Europeans, CHB  
90 (Chinese from Beijing) to represent East Asians and 118 ancient European hunter-gatherers  
91 (HG) to represent Mesolithic Europe (Mathieson and Mathieson 2018). We replicate the  
92 elevated PBS(PEL, (CEU, CHB)) statistic at the *FADS* locus (Fig.2 left column; upper 0.0002  
93 quantile), but find that it largely disappears if we replace CHB with HG (Fig. 2 right column;  
94 upper 0.016 quantile). Two of the LD block 2 SNPs originally identified by Fumagalli, et al.  
95 (2015)—rs74771917 and rs7115739—still have extreme PBS values, but the PBS is no longer  
96 elevated across the locus (Fig.2). Conversely, both PBS(CEU, (PEL, HG)) and PBS(CHB, (PEL, HG))  
97 do show elevated values (upper 0.00004 and 0.0006 quantiles). These results are consistent  
98 with the model of parallel adaptation in CEU and CHB shown in Fig. 1d.

## 99 A potential secondary signal of selection

100 While the Native American PBS signal in LD block 1 (containing rs174570, rs174556 and  
101 rs174537) disappears when Mesolithic hunter-gatherers are used as an outgroup, part of the  
102 signal (at rs74771917 and rs7115739) that is restricted to LD block 2 remains (Fig. 2). Using  
103 sequence data from the 1000 Genomes project we identified three additional SNPs that are  
104 highly differentiated between present-day Native American and Eurasian ancestral allele  
105 carriers (Figure 4). Among individuals who carry the ancestral haplotype at LD block 1, this LD  
106 block 2 haplotype has a frequency of around 100% in the Greenland Inuit (Fumagalli, et al.  
107 2015) 82% in PEL, 34% in CHB, 9% in HG and 4% in CEU. The Anzick individual (Rasmussen, et al.  
108 2014) carries two copies, while the 40,000-year old East Asian Tianyuan individual (Yang, et al.

109 2017) carries one. It therefore remains possible that the high frequency of this haplotype  
110 represents a secondary signal of selection in the common ancestor of Inuit and Native  
111 Americans. On the other hand, this region is not a genome-wide outlier in the standard  
112 window-based PBS analysis and the frequency of this haplotype may have been driven by linked  
113 selection on LD block 1. Further, the LD block 2 haplotype has not been shown to affect  
114 expression of any of the *FADS* genes or any other phenotype, independent of the LD block 1  
115 haplotype. Within-population, the two blocks are highly correlated, so it would be necessary to  
116 perform conditional analysis at the locus in East Asian populations to identify any independent  
117 effect of the LD block 2 haplotype.

## 118 Conclusion

119 The Native American specific signal of selection at the *FADS* locus is largely an artefact driven by  
120 parallel selection on the European and East Asian lineages. The ancestral haplotype at LD block  
121 1 may have been selected in Upper Paleolithic Eurasian populations but this likely took place  
122 around or before the split of East and West Eurasian populations 40-60,000 years ago and  
123 certainly before the Native American and Siberian lineages split. There remains some evidence  
124 of a secondary signal of selection in LD block 2 but this is shared by Inuit and Siberians and not  
125 specific to Native Americans. The complex history of selection at this locus likely confounds  
126 selection scans in other populations as well. Finally, this analysis demonstrates the ability of  
127 direct evidence from ancient DNA to resolve complex evolutionary histories that may not be  
128 identifiable using present-day data.

129

## 130 Acknowledgments

131 I.M. was supported by a Research Fellowship from the Alfred P. Sloan foundation [FG-2018-  
132 10647], a New Investigator Research Grant from the Charles E. Kaufman Foundation [KA2018-  
133 98559], and NIGMS award number [R35GM133708]. The content is solely the responsibility of  
134 the author and does not necessarily represent the official views of the National Institutes of  
135 Health. We thank Shai Carmi, Matteo Fumagalli, Rasmus Nielsen, Fernando Racimo and Pontus  
136 Skoglund for helpful comments on earlier drafts.

## 137 References

138

139 1000 Genomes Project Consortium. 2015. A global reference for human genetic variation.

140 *Nature* 526:68-74.

141 Ameur A, Enroth S, Johansson A, Zaboli G, Igl W, Johansson AC, Rivas MA, Daly MJ, Schmitz G,  
142 Hicks AA, et al. 2012. Genetic adaptation of fatty-acid metabolism: a human-specific haplotype  
143 increasing the biosynthesis of long-chain omega-3 and omega-6 fatty acids. *Am J Hum Genet*  
144 90:809-820.

145 Amorim CE, Nunes K, Meyer D, Comas D, Bortolini MC, Salzano FM, Hunemeier T. 2017. Genetic  
146 signature of natural selection in first Americans. *Proc Natl Acad Sci U S A* 114:2195-2199.

147 Buckley MT, Racimo F, Allentoft ME, Jensen MK, Jonsson A, Huang H, Hormozdiari F, Sikora M,  
148 Marnetto D, Eskin E, et al. 2017. Selection in Europeans on Fatty Acid Desaturases Associated  
149 with Dietary Changes. *Mol Biol Evol* 34:1307-1318.

150 Darios F, Davletov B. 2006. Omega-3 and omega-6 fatty acids stimulate cell membrane  
151 expansion by acting on syntaxin 3. *Nature* 440:813-817.

152 Fu Q, Li H, Moorjani P, Jay F, Slepchenko SM, Bondarev AA, Johnson PL, Aximu-Petri A, Prufer K,  
153 de Filippo C, et al. 2014. Genome sequence of a 45,000-year-old modern human from western  
154 Siberia. *Nature* 514:445-449.

155 Fu Q, Posth C, Hajdinjak M, Petr M, Mallick S, Fernandes D, Furtwängler A, Haak W, Meyer M,  
156 Mittnik A, et al. 2016. The genetic history of Ice Age Europe. *Nature* 534:200-205.

157 Fumagalli M, Moltke I, Grarup N, Racimo F, Bjerregaard P, Jorgensen ME, Korneliussen TS,  
158 Gerbault P, Skotte L, Linneberg A, et al. 2015. Greenlandic Inuit show genetic signatures of diet  
159 and climate adaptation. *Science* 349:1343-1347.

160 Harris DN, Ruczinski I, Yanek LR, Becker LC, Becker DM, Guio H, Cui T, Chilton FH, Mathias RA,  
161 O'Connor T. 2019. Evolution of Hominin Polyunsaturated Fatty Acid Metabolism: From Africa to  
162 the New World. *Genome Biology and Evolution* 11:1417-1430.

163 Hlusko LJ, Carlson JP, Chaplin G, Elias SA, Hoffecker JF, Huffman M, Jablonski NG, Monson TA,  
164 O'Rourke DH, Pilloud MA, et al. 2018. Environmental selection during the last ice age on the  
165 mother-to-infant transmission of vitamin D and fatty acids through breast milk. *Proc Natl Acad*  
166 *Sci U S A*.

167 Marszalek JR, Lodish HF. 2005. Docosahexaenoic acid, fatty acid-interacting proteins, and  
168 neuronal function: breastmilk and fish are good for you. *Annu Rev Cell Dev Biol* 21:633-657.

169 Martin AR, Gignoux CR, Walters RK, Wojcik GL, Neale BM, Gravel S, Daly MJ, Bustamante CD,  
170 Kenny EE. 2017. Human Demographic History Impacts Genetic Risk Prediction across Diverse  
171 Populations. *Am J Hum Genet* 100:635-649.

172 Mathias RA, Fu W, Akey JM, Ainsworth HC, Torgerson DG, Ruczinski I, Sergeant S, Barnes KC,  
173 Chilton FH. 2012. Adaptive evolution of the FADS gene cluster within Africa. *PLoS One*  
174 7:e44926.

175 Mathieson I, Lazaridis I, Rohland N, Mallick S, Patterson N, Roodenberg SA, Harney E,  
176 Stewardson K, Fernandes D, Novak M, et al. 2015. Genome-wide patterns of selection in 230  
177 ancient Eurasians. *Nature* 528:499-503.

178 Mathieson S, Mathieson I. 2018. FADS1 and the Timing of Human Adaptation to Agriculture.  
179 *Mol Biol Evol* 35:2957-2970.

180 Nakamura MT, Nara TY. 2004. Structure, function, and dietary regulation of delta6, delta5, and  
181 delta9 desaturases. *Annu Rev Nutr* 24:345-376.

182 Raghavan M, Skoglund P, Graf KE, Metspalu M, Albrechtsen A, Moltke I, Rasmussen S, Stafford  
183 Jr TW, Orlando L, Metspalu E, et al. 2014. Upper Palaeolithic Siberian genome reveals dual  
184 ancestry of Native Americans. *Nature* 505:87-91.

185 Rasmussen M, Anzick SL, Waters MR, Skoglund P, DeGiorgio M, Stafford Jr TW, Rasmussen S,  
186 Moltke I, Albrechtsen A, Doyle SM, et al. 2014. The genome of a Late Pleistocene human from a  
187 Clovis burial site in western Montana. *Nature* 506:225-229.

188 Sikora M, Pitulko VV, Sousa VC, Allentoft ME, Vinner L, Rasmussen S, Margaryan A, de Barros  
189 Damgaard P, de la Fuente C, Renaud G, et al. 2019. The population history of northeastern  
190 Siberia since the Pleistocene. *Nature* 570:182-188.

191 Sikora M, Seguin-Orlando A, Sousa VC, Albrechtsen A, Korneliussen T, Ko A, Rasmussen S,  
192 Dupanloup I, Nigst PR, Bosch MD, et al. 2017. Ancient genomes show social and reproductive  
193 behavior of early Upper Paleolithic foragers. *Science* 358:659-662.

194 Teslovich TM, Musunuru K, Smith AV, Edmondson AC, Stylianou IM, Koseki M, Pirruccello JP,  
195 Ripatti S, Chasman DI, Willer CJ, et al. 2010. Biological, clinical and population relevance of 95  
196 loci for blood lipids. *Nature* 466:707-713.

197 Yang MA, Gao X, Theunert C, Tong H, Aximu-Petri A, Nickel B, Slatkin M, Meyer M, Pääbo S,  
198 Kelso J, et al. 2017. 40,000-Year-Old Individual from Asia Provides Insight into Early Population  
199 Structure in Eurasia. *Current Biology* 27:3202-3208.e3209.

200 Ye K, Gao F, Wang D, Bar-Yosef O, Keinan A. 2017. Dietary adaptation of FADS genes in Europe  
201 varied across time and geography. *Nat Ecol Evol* 1:167.

202 Yi X, Liang Y, Huerta-Sanchez E, Jin X, Cuo ZX, Pool JE, Xu X, Jiang H, Vinckenbosch N,  
203 Korneliussen TS, et al. 2010. Sequencing of 50 human exomes reveals adaptation to high  
204 altitude. *Science* 329:75-78.

205

206



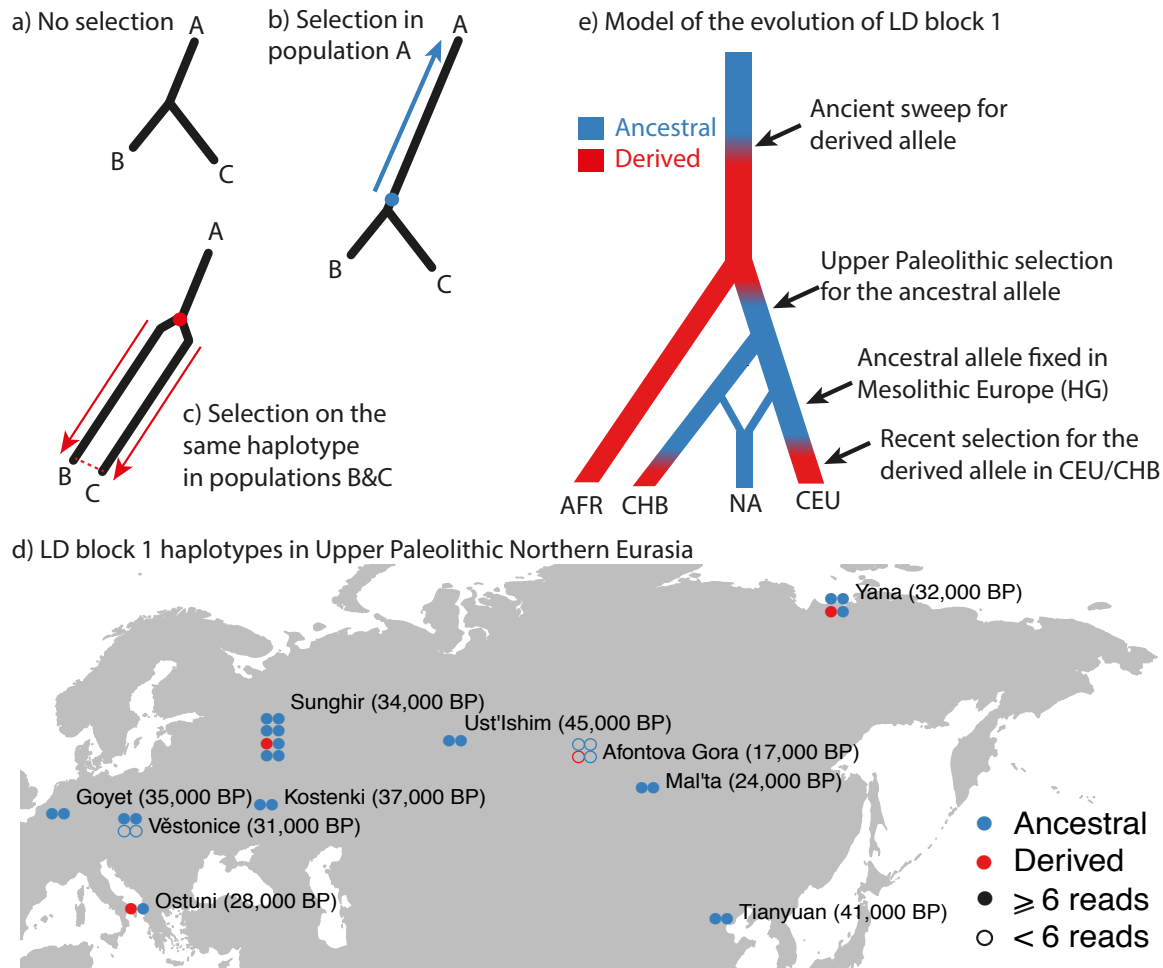

207

208 **Figure 1:** **a)** The PBS compares genetic differentiation (branch length) between three  
 209 populations. **b)** If a new mutation (blue dot) is under selection in one population (A), the branch  
 210 length leading to A will be longer—a signal of selection. **c)** If a haplotype that exists in the  
 211 ancestral population (red dot) is under selection in both populations B and C then, because B  
 212 and C look very similar, the PBS misattributes the long branch length to A, instead of to B and C.  
 213 **d)** LD block 1 haplotypes in Upper Paleolithic Eurasia (Fu, et al. 2014; Raghavan, et al. 2014; Fu,  
 214 et al. 2016; Sikora, et al. 2017; Yang, et al. 2017; Sikora, et al. 2019). Ancestral and derived  
 215 haplotype defined as haplotypes A and C (Mathieson and Mathieson 2018) **e)** Model for the  
 216 evolution of present-day African (AFR), East Asian (CHB), Native American (NA) and European  
 217 (CEU) population showing where derived (red) and ancestral (blue) haplotypes are common.  
 218



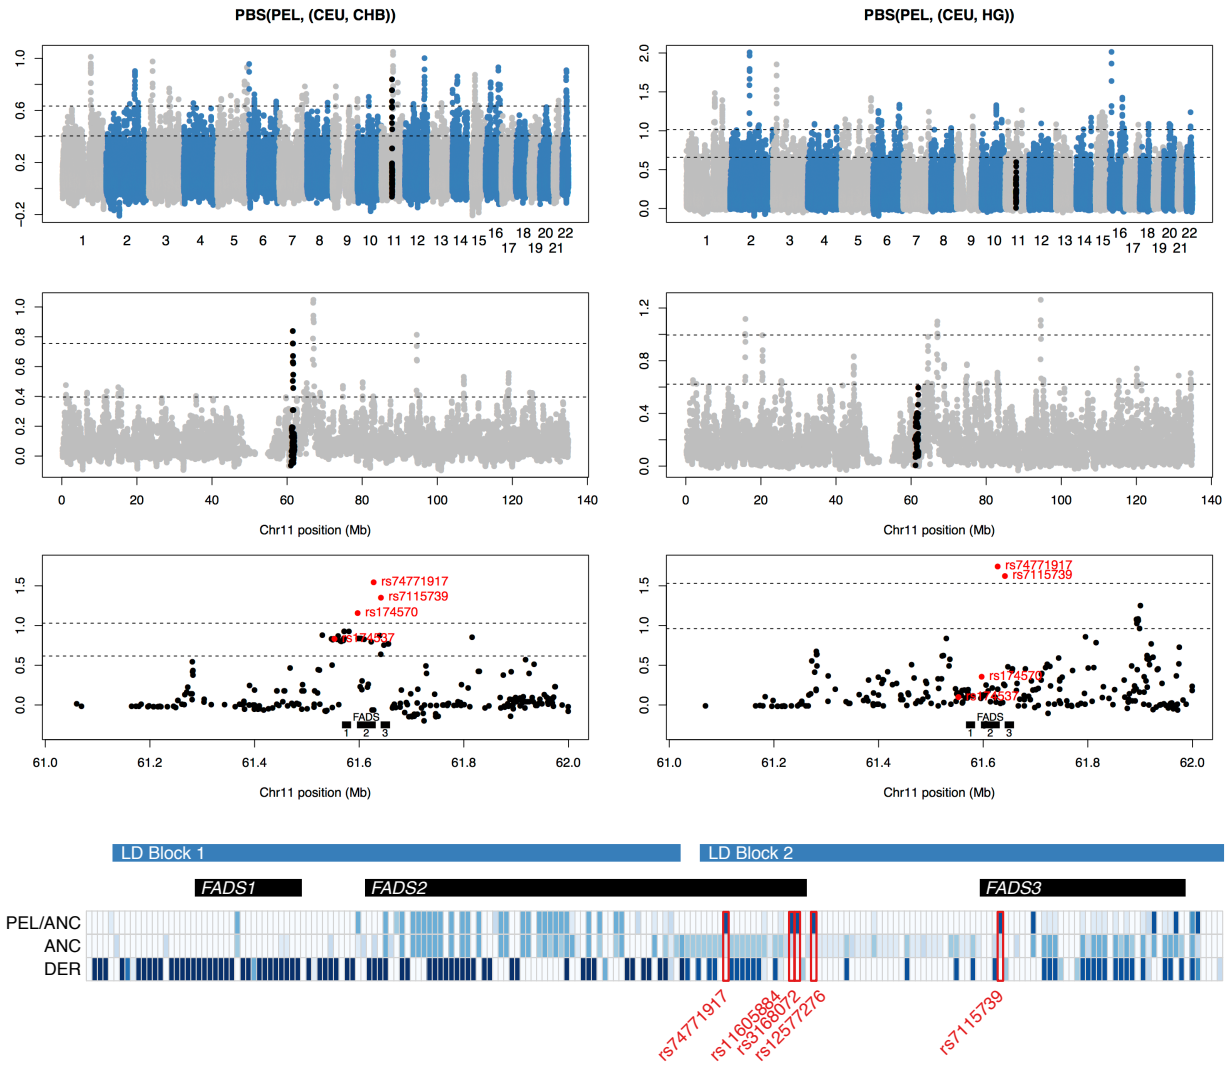

219

220 **Figure 2:** PBS on the Native American branch. Left column; PBS(PEL,(CEU,CHB)). Right column,  
 221 PBS(PEL,(CEU,HG)). Upper row; genome-wide PBS in overlapping 20-SNP windows, each shifted  
 222 by 5 SNPs. Black points indicate the region Chr11:61-62Mb (hg19) that contains the *FADS* locus.  
 223 Second row; Chromosome 11 PBS in overlapping 20-SNP windows. Third row; per-SNP PBS in  
 224 the region Chr11:61-62M. Horizontal lines indicate upper 0.01 and 0.001 genome-wide PBS  
 225 quantiles. In the lower row, red labeled points indicate SNPs previously identified as targets of  
 226 selection (Fumagalli, et al. 2015; Amorim, et al. 2017). Top three rows restricted to 903,961  
 227 autosomal SNPs present on the 1240k capture array with a minor allele frequency of at least 5%  
 228 in at least one of the four populations. Lower row: Allele frequencies for all SNPs at >1%  
 229 frequency in at least one population in CEU and CHB individuals carrying the derived haplotype  
 230 (DER), the ancestral haplotype (ANC) and for PEL individuals carrying the ancestral haplotype  
 231 (PEL/ANC). Color indicates the frequency of the variant that is less common on the ancestral  
 232 haplotype. Highlighted in red are the five LD block 2 SNPs that have >50% difference in  
 233 frequency between ANC and PEL/ANC, and at most 10% frequency in DER.

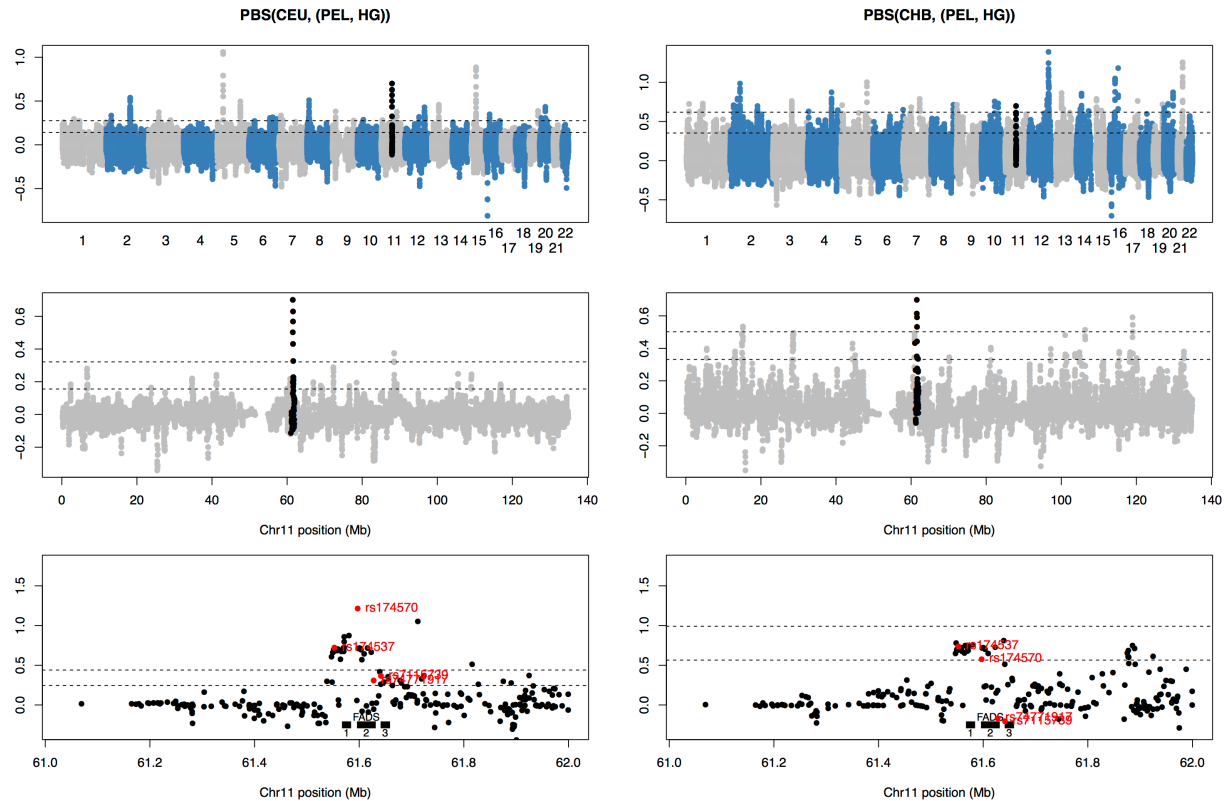

234

235 **Supplementary Figure 1:** Population branch statistics around the *FADS* locus on European and

236 East Asian branches. Left column; PBS(CEU,(PEL,HG)). Right column, PBS(CHB,(PEL,HG)). Upper

237 row; genome-wide PBS in overlapping 20-SNP windows, each shifted by 5 SNPs. Black points

238 indicate the region Chr11:61-62Mb (hg19) that contains the *FADS* locus. Middle row;

239 Chromosome 11 PBS in overlapping 20-SNP windows. Lower row; per-SNP PBS in the region

240 Chr11:61-62M. In each plot, horizontal lines indicate upper 0.01 and 0.001 genome-wide PBS

241 quantiles. In the lower row, the location of *FADS1*, 2 and 3 is indicted with black bars, while red

242 labeled points indicate SNPs previously identified as targets of selection (Fumagalli, et al. 2015;

243 Amorim, et al. 2017). Restricted to 903,961 SNPs present on the 1240k capture array with a

244 minor allele frequency of at least 5% in at least one of the four populations.

245

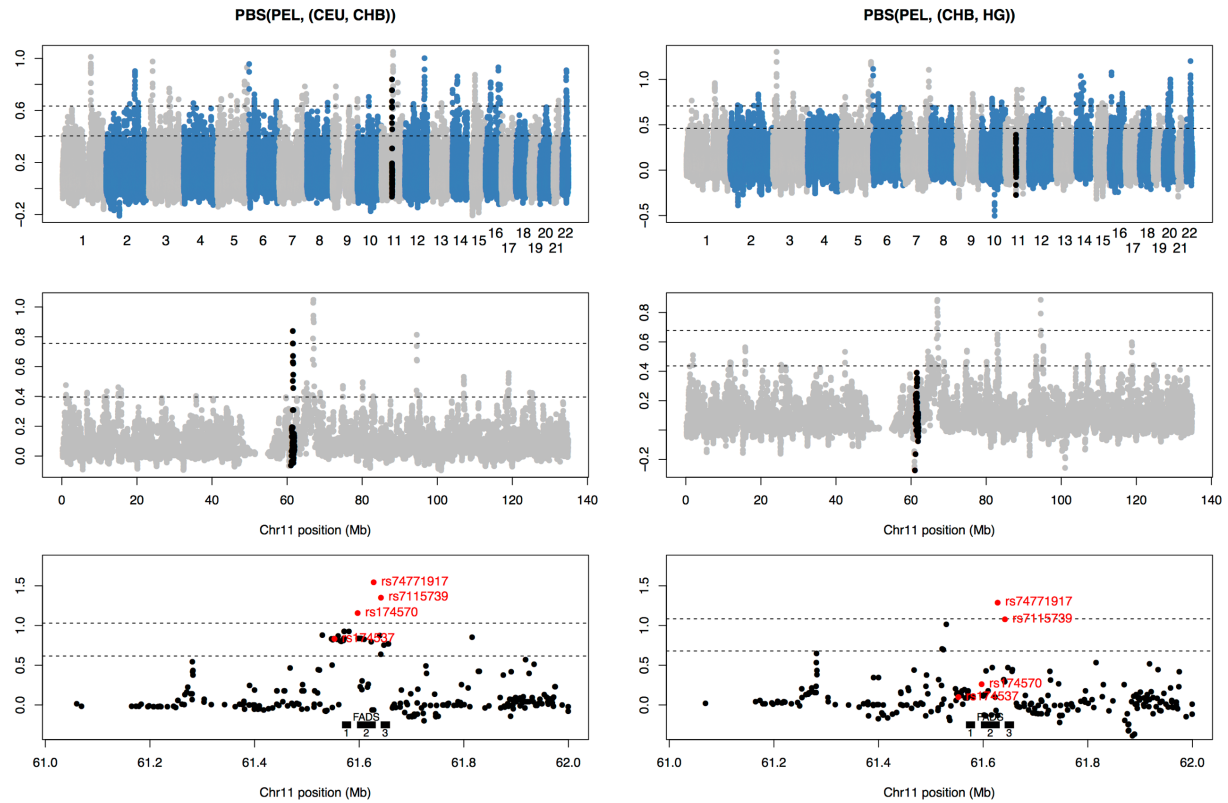

246

247

248

**Supplementary Figure 2:** As Figure 2, but with PBS(PEL,(CHB,HG)) in the right-hand column, instead of PBS(PEL, (CEU,HG))

| CHR                                           | POS      | ID       | REF | ALT | GoyetQ116 | Vestonice 13 | Vestonice 16 | Ostuni 1 | Kostenki 14 | Sungbir I | Sungbir II | Sungbir III | Sungbir IV | Afontova Gora 2 | Afontova Gora 3 | Ust'Ishim | MA1 | Tianyuan | Yana  | Yana 2 |
|-----------------------------------------------|----------|----------|-----|-----|-----------|--------------|--------------|----------|-------------|-----------|------------|-------------|------------|-----------------|-----------------|-----------|-----|----------|-------|--------|
| 11                                            | 61551927 | rs174536 | A   | C   | 0,1       | 0,2          | 0,1          | 1,1      | 0,12        | 0,1       | 0,4        | 3,5         | 0,1        | 0,0             | 0,0             | 0,29      | 0,1 | 0,0      | 11,7  | 0,8    |
| 11                                            | 61552680 | rs174537 | G   | T   | 0,3       | 0,0          | 0,0          | 0,0      | 0,16        | 0,1       | 0,6        | 3,8         | 0,2        | 1,0             | 0,0             | 0,19      | 0,1 | 0,5      | 11,10 | 0,8    |
| 11                                            | 61557826 | rs102274 | T   | C   | 0,6       | 0,3          | 0,10         | 1,2      | 0,93        | 0,1       | 0,7        | 10,7        | 0,7        | 0,0             | 0,0             | 0,20      | 0,1 | 0,11     | 10,20 | 0,4    |
| 11                                            | 61569306 | rs174545 | C   | G   | 0,0       | 0,0          | 0,0          | 0,0      | 0,0         | 0,2       | 0,5        | 6,6         | 0,3        | 0,0             | 0,0             | 0,39      | 0,0 | 0,0      | 14,20 | 0,8    |
| 11                                            | 61569830 | rs174546 | C   | T   | 0,6       | 0,0          | 0,17         | 0,0      | 0,75        | 0,0       | 0,4        | 7,8         | 0,7        | 0,1             | 0,2             | 0,38      | 0,4 | 0,0      | 10,14 | 0,8    |
| 11                                            | 61570783 | rs174547 | T   | C   | 0,0       | 0,0          | 0,5          | 0,0      | 1,19        | 0,0       | 0,9        | 9,3         | 0,4        | 0,0             | 0,0             | 0,33      | 0,0 | 0,7      | 13,15 | 1,7    |
| 11                                            | 61571478 | rs174550 | T   | C   | 0,0       | 0,0          | 0,10         | 0,0      | 0,67        | 0,5       | 0,5        | 5,7         | 0,5        | 0,1             | 0,1             | 0,25      | 0,1 | 0,9      | 11,17 | 0,6    |
| 11                                            | 61575158 | rs174553 | A   | G   | 0,0       | 0,0          | 0,0          | 0,0      | 0,0         | 0,0       | 0,8        | 3,7         | 0,3        | 1,0             | 0,0             | 0,30      | 0,0 | 0,0      | 9,17  | 0,4    |
| 11                                            | 61579463 | rs174554 | A   | G   | 0,0       | 0,0          | 0,3          | 1,0      | 1,20        | 0,0       | 0,2        | 4,4         | 0,4        | 0,0             | 0,0             | 5,20      | 0,0 | 0,0      | 14,16 | 1,6    |
| 11                                            | 61585144 | rs174562 | A   | G   | 0,0       | 0,0          | 0,0          | 0,0      | 0,0         | 0,1       | 0,4        | 10,9        | 0,4        | 0,0             | 0,0             | 1,46      | 0,0 | 0,0      | 21,18 | 0,3    |
| 11                                            | 61588305 | rs174564 | A   | G   | 0,0       | 0,0          | 2,0          | 0,0      | 7,9         | 0,0       | 0,1        | 3,1         | 0,5        | 0,0             | 0,0             | 15,15     | 0,0 | 0,0      | 7,1   | 0,2    |
| <b>Ancestral (A) or Dervied (D) haplotype</b> |          |          |     |     | AA        | AA?          | AA           | AD       | AA          | AA        | AA         | AD          | AA         | AD?             | AA?             | AA        | AA  | AA       | AD    | AA     |

249

250 **Supplementary Table 1:** Reads supporting the reference (derived) and alternative (ancestral)  
 251 allele (der,anc) at 11 SNPs used to define derived haplotype C (Mathieson and Mathieson  
 252 2018).
